# Supplementary material
Source: HighWire-hosted journal article supplement (https://jnm.snmjournals.org/highwire/filestream/95488/field_highwire_adjunct_files/0/217372_Supplemental_Data.pdf)
Supplement: 217372_Supplemental_Data.pdf [file 217372_Supplemental_Data.pdf]

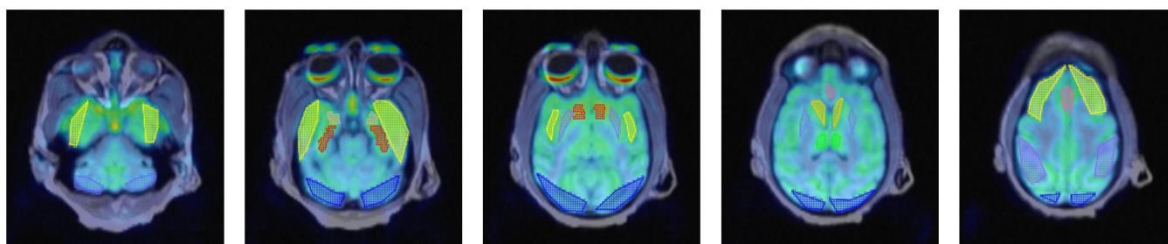

Supplemental Fig. 1. An example set of VOIs on the MRI/PET images

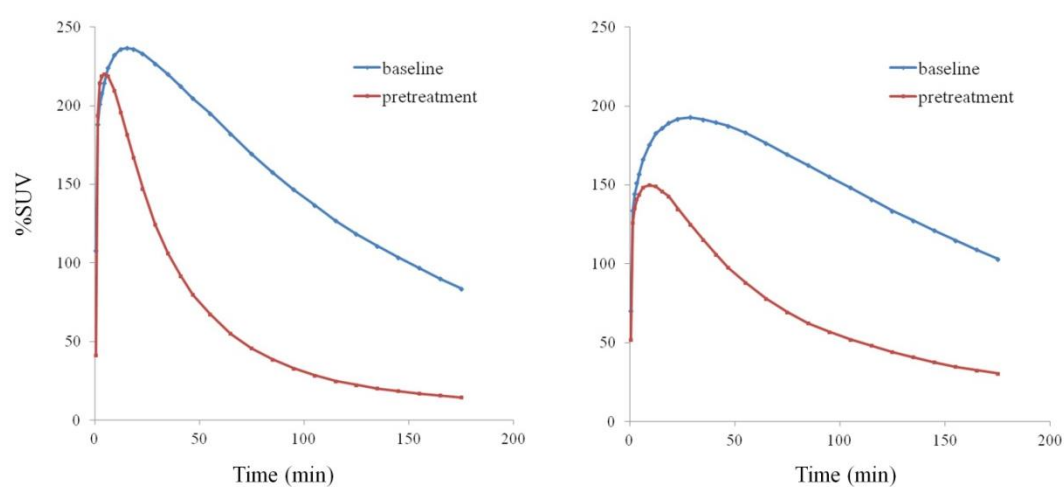

Supplemental Fig. 2. Whole brain time activity curves of  $^{18}\text{F}$ -PF-06684511 at the baseline and pretreatment with LY2886721 (left: NHP 1 and right: NHP 2). %SUV: radioactivity in the brain (MBq/cc)/injected radioactivity(MBq)  $\times$  body weight (g)  $\times$  100 (%).

A.

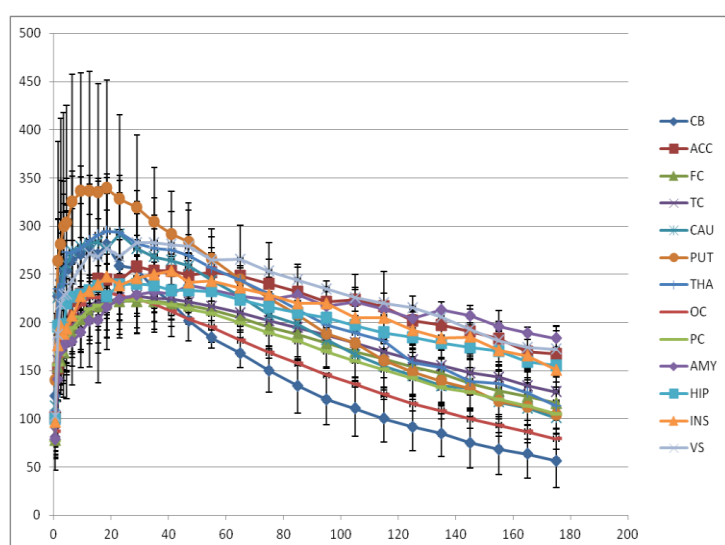

B.

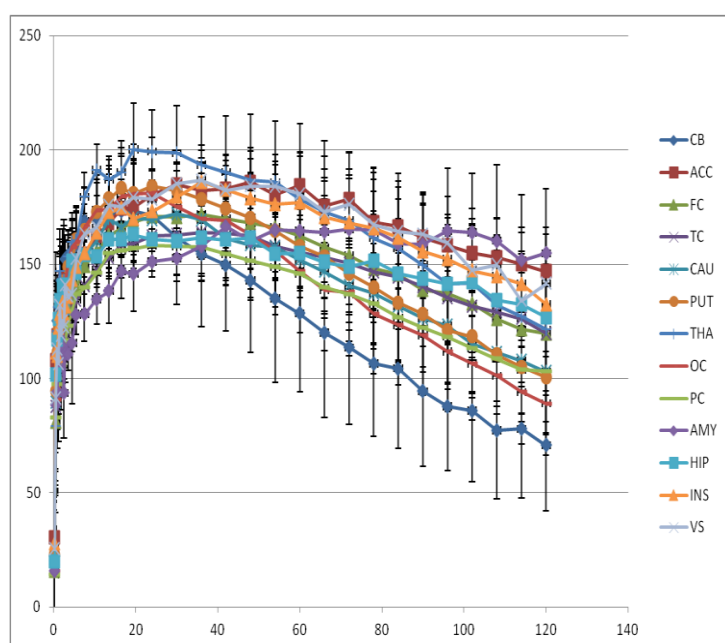

Supplemental Fig. 3. Average time activity curves of  $^{18}\text{F}$ -PF-06684511. A: 180-minute baseline PET measurements in the baseline/blocking study (n=2). B: 120-minute baseline PET measurements in the occupancy study (n=4). X-axis is time (minute) and Y-axis is % SUV.

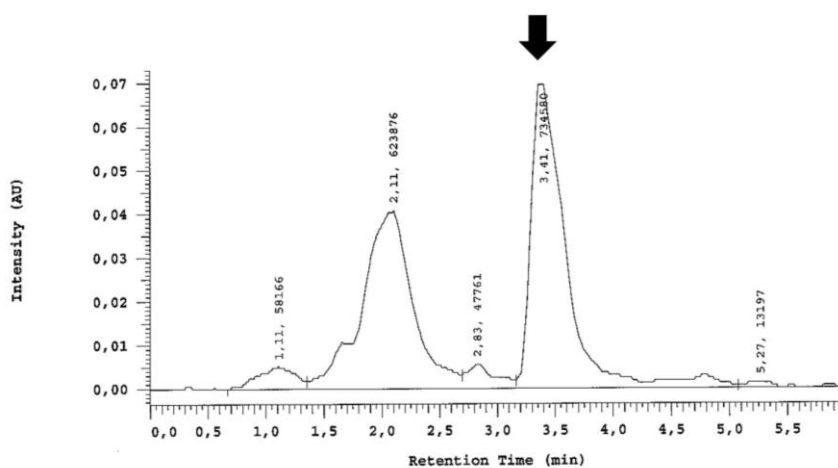

Supplemental Fig. 4. Radio-HPLC chromatogram at 45min in NHP 1 at the baseline. Black arrow indicates the peak of  $^{18}\text{F}$ -PF-06684511.

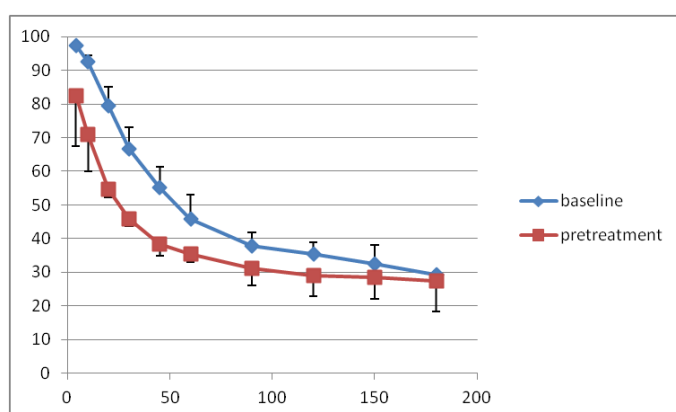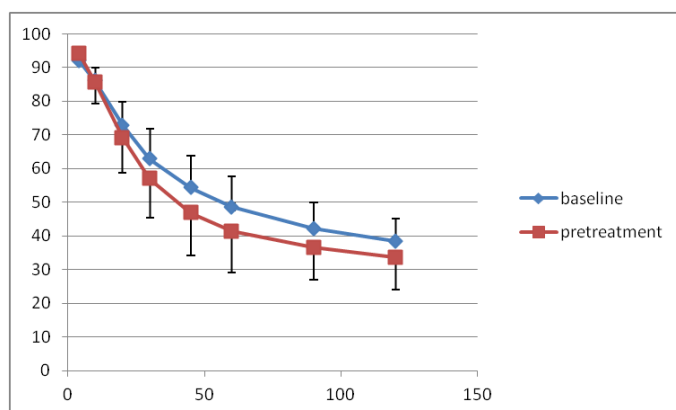

Supplemental Fig. 5. Average percent fraction of unmetabolized  $^{18}\text{F}$ -PF-06684511 in the plasma. Upper: 180-minute PET measurements in the baseline/blocking study (n=2). Lower:

120-minute PET measurements in the occupancy study (n=4). X-axis is time (minute) and Y-axis is %fraction of unmetabolized radioligand.

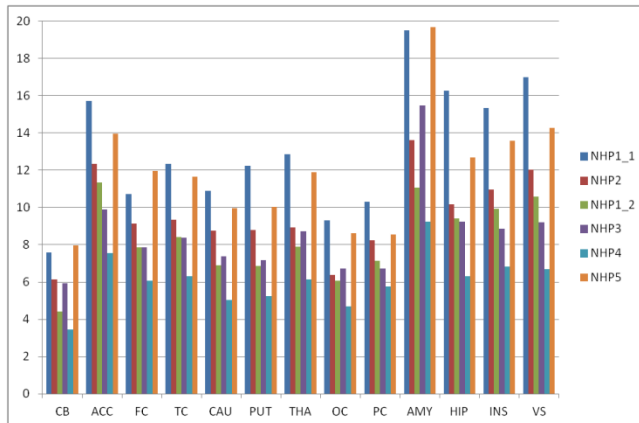

Supplemental Fig. 6. Individual  $V_T$  values estimated by 2TC of 5 monkeys. X-axis is the brain regions and Y-axis is  $V_T$  values.

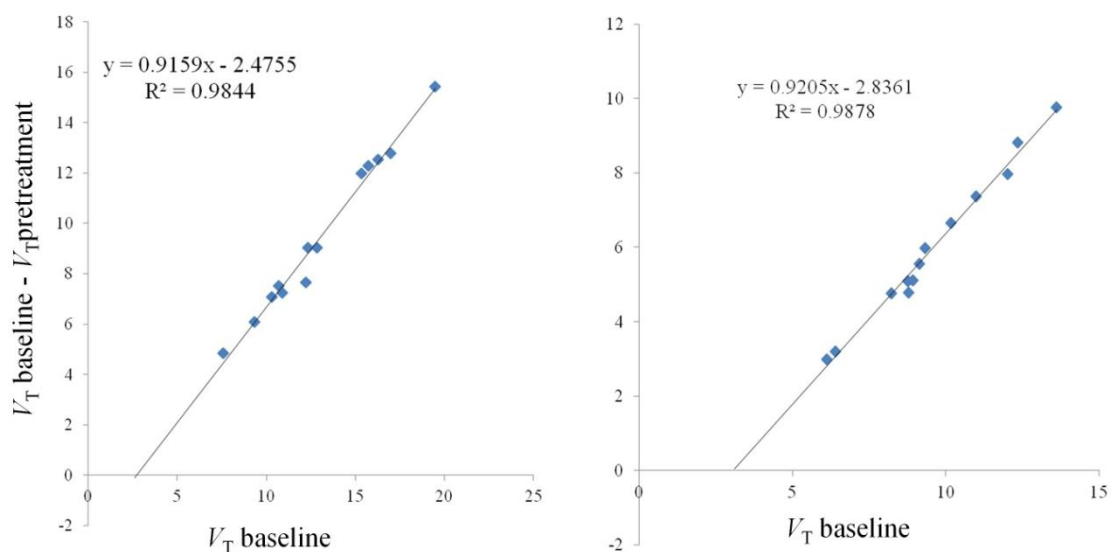

Supplemental Fig. 7. Lassen plots using  $V_T$  estimated with 2TC (left: NHP 1 and right: NHP 2).

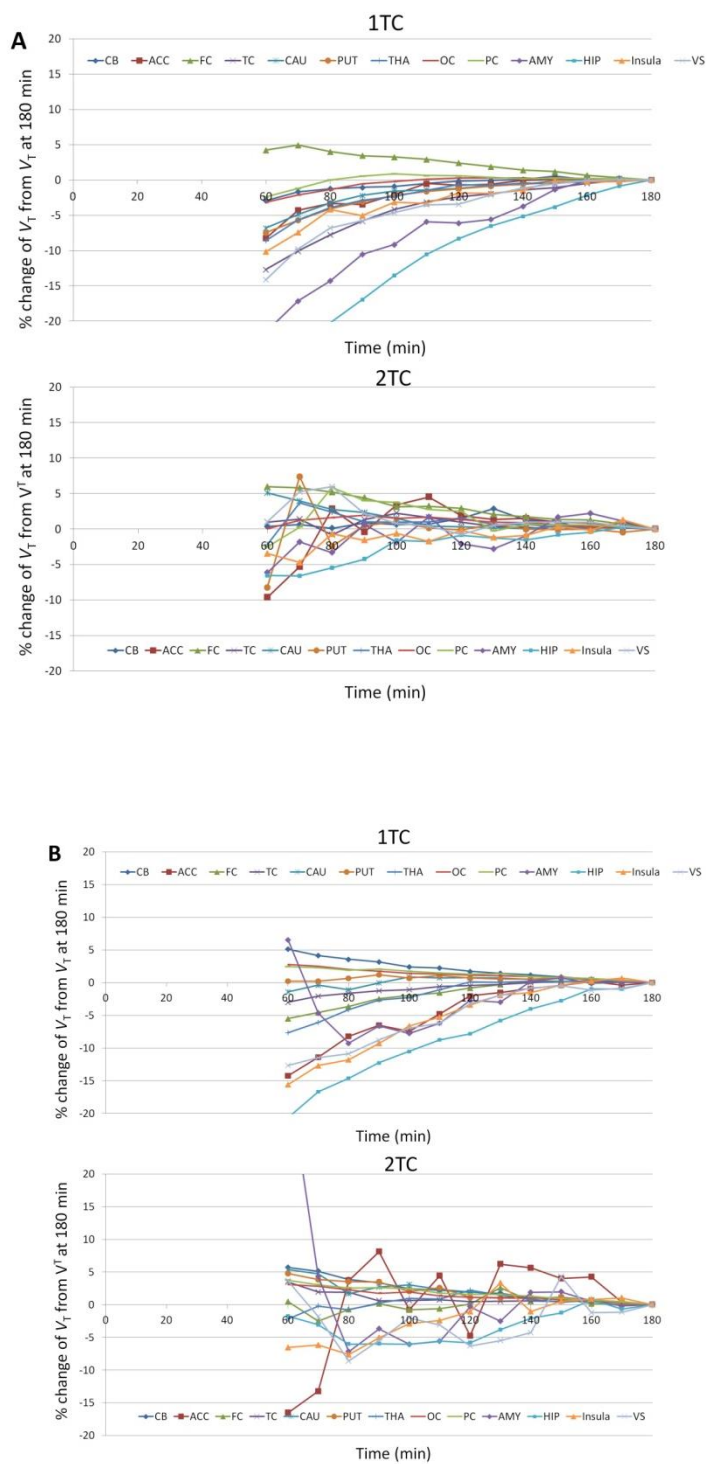

Supplemental Fig. 8. Time stability of  $V_T$  values. (A: NHP 1 and B: NHP2)

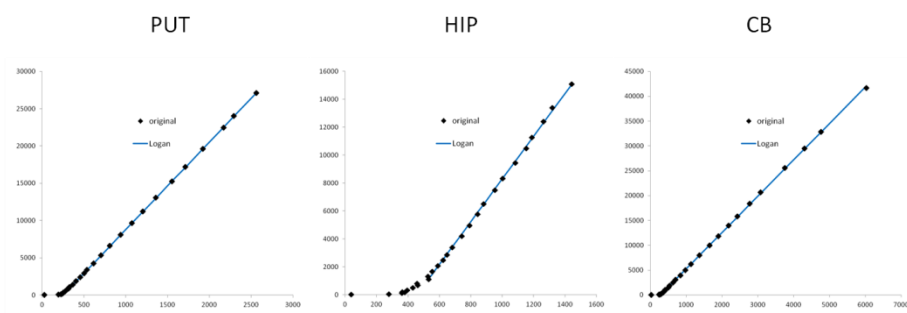

Supplemental Fig. 9. Examples of Logan plots in putamen (PUT), hippocampus (HIP) and cerebellum (CB).

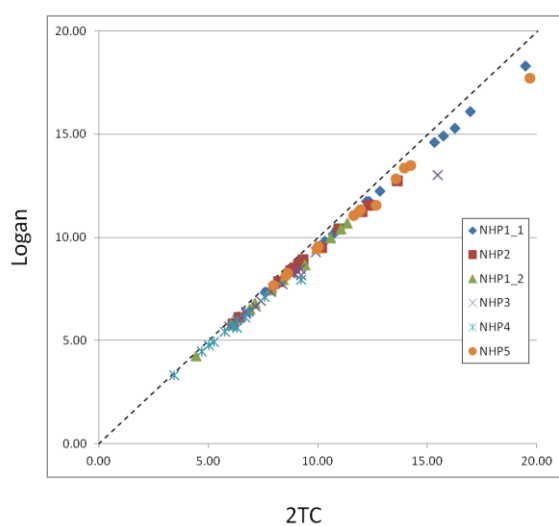

Supplemental Fig. 10. Correlation of  $V_T$  values between 2TC and Logan plot.

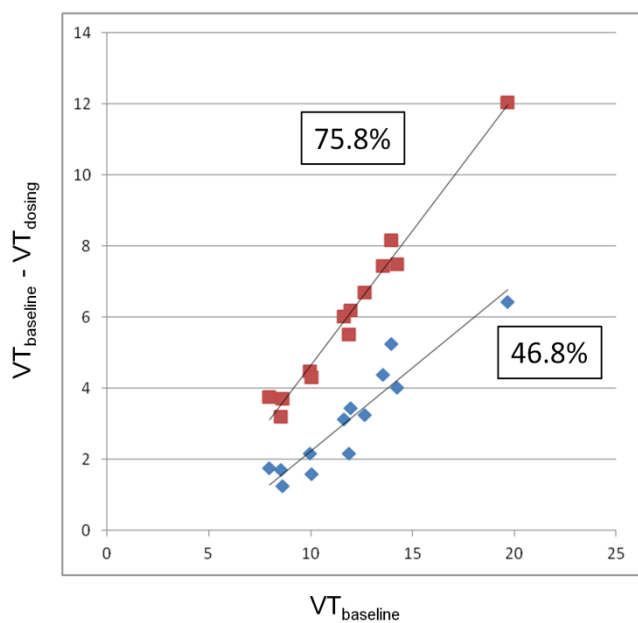

Supplemental Fig.11. Examples of Lassen plots in the occupancy study with PF-06663195.

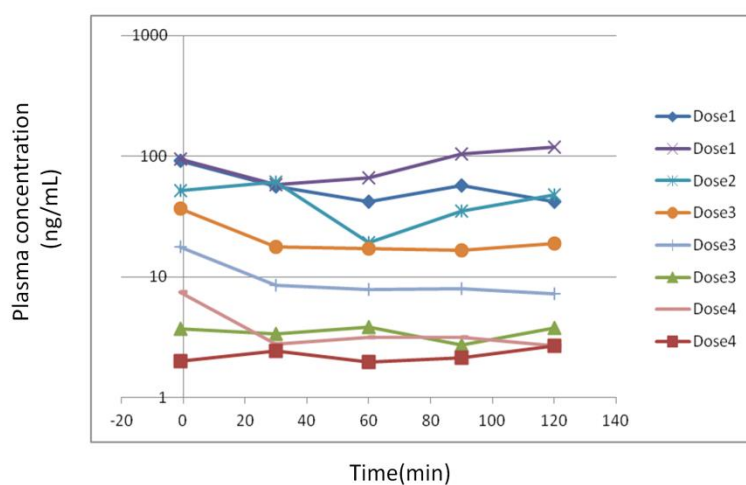

|       | Bolus (mg/kg) | Constant (mg/hr/kg) |
|-------|---------------|---------------------|
| Dose1 | 0.266         | 0.064               |
| Dose2 | 0.133         | 0.032               |
| Dose3 | 0.089         | 0.021               |
| Dose4 | 0.022         | 0.005               |

Supplemental Fig. 12. The time courses of the plasma concentration of PF-06663195 in the occupancy study.

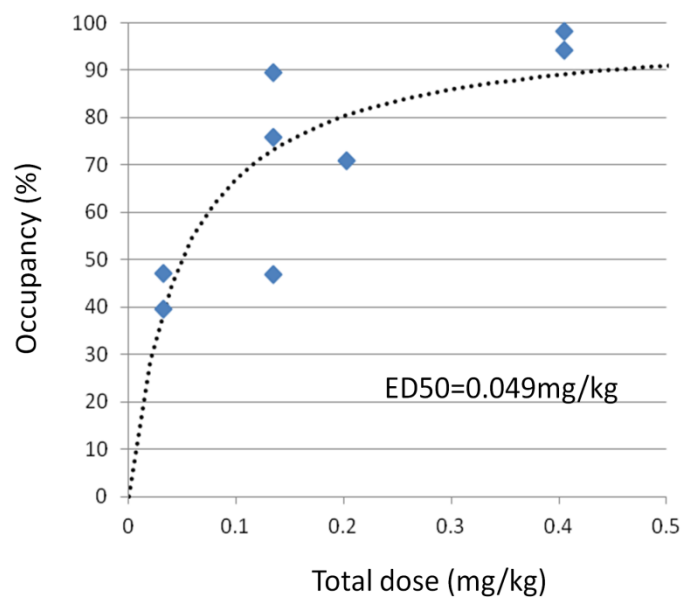

Supplemental Fig. 13. The relationship between the total administered dose of PF-06663195 and BACE1 occupancy in the occupancy study.

A.

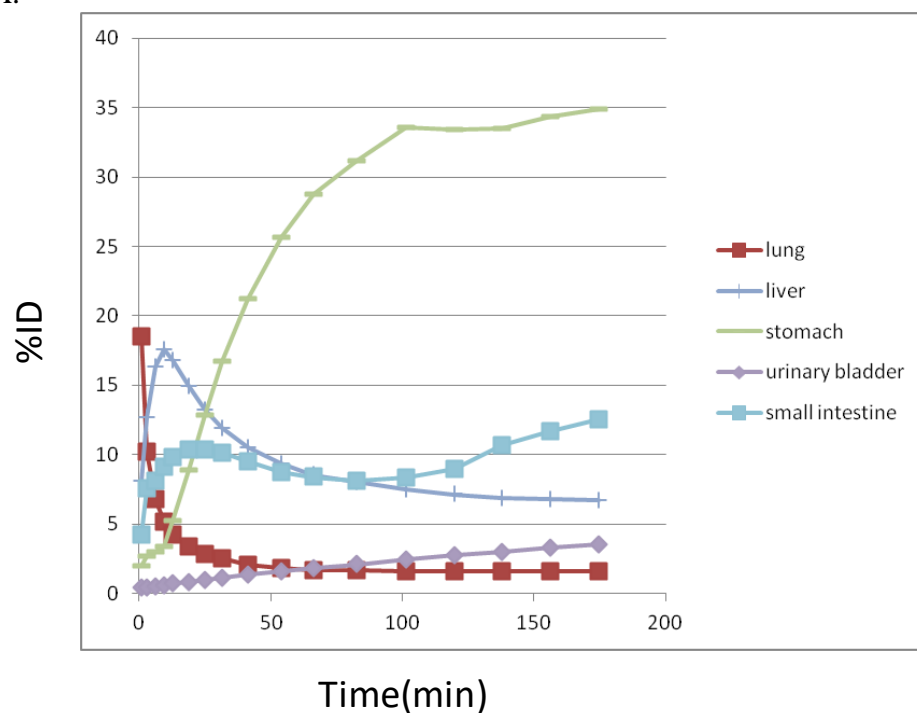

B.

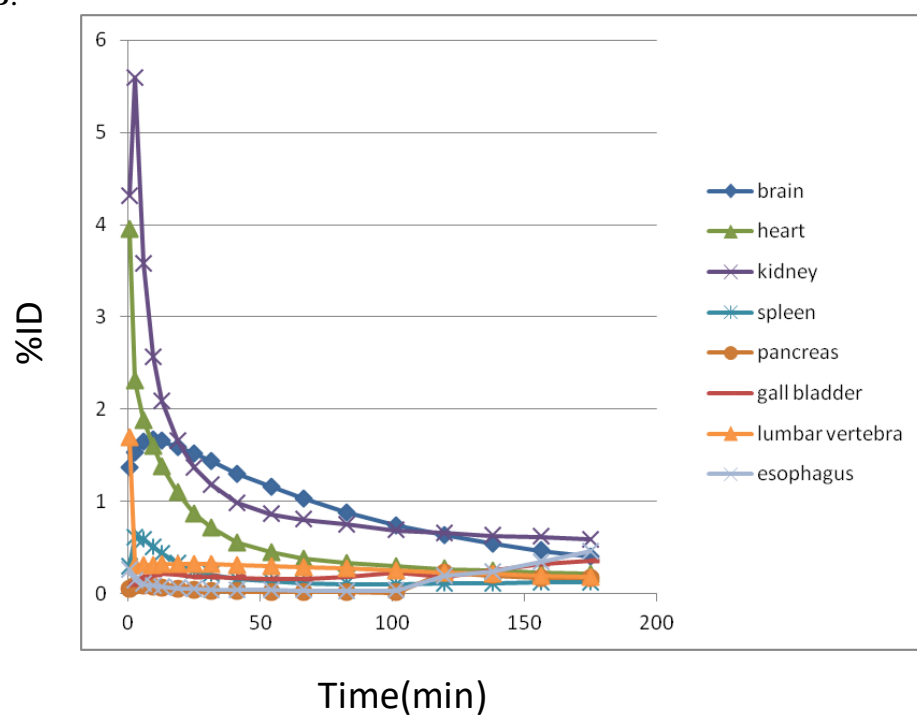

Supplemental Fig. 14. The time course of organ uptake of  $^{18}\text{F}$ -PF-06684511 in NHP 7 in the whole-body dosimetry experiment (A: Higher uptake organs and B: Lower uptake organs).

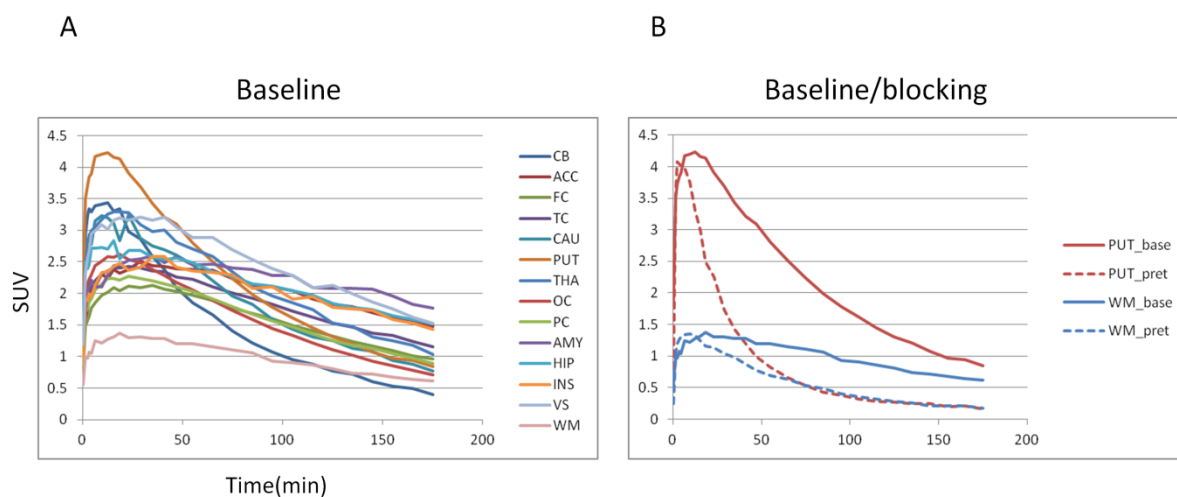

Supplemental Fig. 15. A. The time activity curves of  $^{18}\text{F}$ -PF-06684511 in NHP 1 including the white matter (WM). B. The change of the time activity curves of putamen (PUT) and white matter after 5 mg/kg of LY2886721.

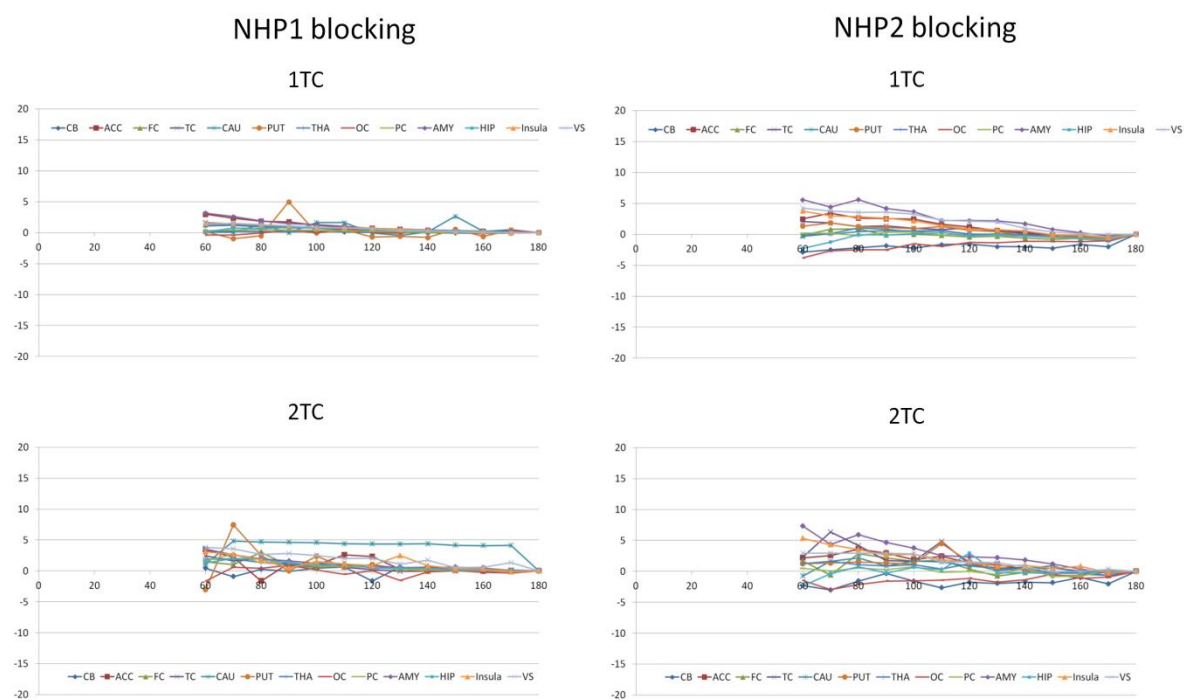

Supplemental Fig. 16. Time stability of  $V_T$  values estimated by 1TC and 2TC of 2 NHPs in the baseline/blocking study.

Supplemental Table 1. Kinetic parameters estimated by one-tissue compartment analysis

| Monkey 1                    |       | baseline |       |       |       |       |       |       |       |        |       |        |        |  |
|-----------------------------|-------|----------|-------|-------|-------|-------|-------|-------|-------|--------|-------|--------|--------|--|
|                             | CB    | ACC      | FC    | TC    | CAU   | PUT   | THA   | OC    | PC    | AMY    | HIP   | INS    | VS     |  |
| K1                          | 0.23  | 0.12     | 0.11  | 0.13  | 0.21  | 0.27  | 0.19  | 0.15  | 0.13  | 0.13   | 0.15  | 0.13   | 0.17   |  |
| k2                          | 0.030 | 0.008    | 0.010 | 0.011 | 0.019 | 0.022 | 0.015 | 0.017 | 0.012 | 0.0068 | 0.010 | 0.0085 | 0.011  |  |
| VT                          | 7.54  | 15.47    | 10.72 | 12.01 | 10.65 | 11.97 | 12.63 | 9.26  | 10.27 | 18.63  | 14.85 | 15.04  | 16.50  |  |
| pretreatment with LY2886721 |       |          |       |       |       |       |       |       |       |        |       |        |        |  |
| K1                          | 0.24  | 0.15     | 0.14  | 0.16  | 0.28  | 0.34  | 0.22  | 0.20  | 0.16  | 0.15   | 0.19  | 0.16   | 0.21   |  |
| k2                          | 0.087 | 0.043    | 0.043 | 0.048 | 0.075 | 0.075 | 0.058 | 0.064 | 0.048 | 0.038  | 0.051 | 0.049  | 0.051  |  |
| VT                          | 2.72  | 3.43     | 3.17  | 3.30  | 3.73  | 4.52  | 3.77  | 3.14  | 3.22  | 4.05   | 3.66  | 3.33   | 4.17   |  |
| Monkey 2                    |       | baseline |       |       |       |       |       |       |       |        |       |        |        |  |
|                             | CB    | ACC      | FC    | TC    | CAU   | PUT   | THA   | OC    | PC    | AMY    | HIP   | INS    | VS     |  |
| K1                          | 0.12  | 0.12     | 0.11  | 0.09  | 0.12  | 0.13  | 0.13  | 0.10  | 0.10  | 0.08   | 0.09  | 0.11   | 0.11   |  |
| k2                          | 0.020 | 0.010    | 0.012 | 0.010 | 0.014 | 0.015 | 0.014 | 0.015 | 0.012 | 0.0060 | 0.010 | 0.010  | 0.0091 |  |
| VT                          | 6.12  | 11.99    | 9.04  | 9.27  | 8.72  | 8.76  | 8.81  | 6.39  | 8.22  | 13.35  | 9.56  | 10.70  | 11.58  |  |
| pretreatment with LY2886721 |       |          |       |       |       |       |       |       |       |        |       |        |        |  |
| K1                          | 0.15  | 0.10     | 0.11  | 0.10  | 0.12  | 0.14  | 0.15  | 0.12  | 0.11  | 0.092  | 0.12  | 0.11   | 0.11   |  |
| k2                          | 0.049 | 0.029    | 0.029 | 0.029 | 0.033 | 0.035 | 0.038 | 0.037 | 0.031 | 0.024  | 0.034 | 0.030  | 0.028  |  |
| VT                          | 3.13  | 3.54     | 3.60  | 3.36  | 3.68  | 4.00  | 3.83  | 3.18  | 3.46  | 3.85   | 3.52  | 3.62   | 4.05   |  |

CB: cerebellum, ACC: anterior cingulate cortex, FC: frontal cortex, TC: temporal cortex, CAU: caudate, PUT: putamen, THA: thalamus, OC: occipital cortex, PC: parietal cortex, AMY: amygdala, HIP: hippocampus, INS: insula, VS: ventral striatum.

Supplemental Table 2. Kinetic parameters estimated by two-tissue compartment analysis

| Monkey 1                    |       | baseline |       |       |       |       |       |       |       |       |       |       |       |
|-----------------------------|-------|----------|-------|-------|-------|-------|-------|-------|-------|-------|-------|-------|-------|
|                             | CB    | ACC      | FC    | TC    | CAU   | PUT   | THA   | OC    | PC    | AMY   | HIP   | INS   | VS    |
| K1                          | 0.24  | 0.13     | 0.11  | 0.14  | 0.24  | 0.30  | 0.22  | 0.16  | 0.13  | 0.15  | 0.19  | 0.14  | 0.20  |
| k2                          | 0.040 | 0.014    | 0.011 | 0.028 | 0.068 | 0.053 | 0.056 | 0.024 | 0.016 | 0.042 | 0.051 | 0.038 | 0.040 |
| k3                          | 0.021 | 0.043    | 0.005 | 0.069 | 0.148 | 0.089 | 0.160 | 0.046 | 0.027 | 0.143 | 0.077 | 0.179 | 0.117 |
| k4                          | 0.073 | 0.064    | 0.094 | 0.050 | 0.070 | 0.076 | 0.070 | 0.110 | 0.103 | 0.031 | 0.022 | 0.057 | 0.048 |
| VT                          | 7.59  | 15.72    | 10.70 | 12.34 | 10.89 | 12.23 | 12.85 | 9.32  | 10.31 | 19.48 | 16.26 | 15.32 | 16.97 |
| pretreatment with LY2886721 |       |          |       |       |       |       |       |       |       |       |       |       |       |
| K1                          | 0.25  | 0.15     | 0.14  | 0.17  | 0.29  | 0.47  | 0.23  | 0.21  | 0.16  | 0.16  | 0.26  | 0.17  | 0.21  |
| k2                          | 0.11  | 0.081    | 0.066 | 0.12  | 0.089 | 0.68  | 0.11  | 0.081 | 0.076 | 0.060 | 0.53  | 0.053 | 0.058 |
| k3                          | 0.061 | 0.31     | 0.35  | 0.74  | 0.019 | 1.17  | 0.23  | 0.026 | 0.24  | 0.34  | 0.88  | 0.012 | 0.029 |
| k4                          | 0.25  | 0.37     | 0.71  | 0.50  | 0.16  | 0.21  | 0.28  | 0.11  | 0.46  | 0.62  | 0.13  | 0.16  | 0.22  |
| VT                          | 2.75  | 3.44     | 3.18  | 3.31  | 3.65  | 4.57  | 3.80  | 3.22  | 3.23  | 4.05  | 3.73  | 3.35  | 4.18  |

| Monkey 2                    |       | baseline |        |       |       |       |       |       |       |        |        |        |        |
|-----------------------------|-------|----------|--------|-------|-------|-------|-------|-------|-------|--------|--------|--------|--------|
|                             | CB    | ACC      | FC     | TC    | CAU   | PUT   | THA   | OC    | PC    | AMY    | HIP    | INS    | VS     |
| K1                          | 0.12  | 0.12     | 0.11   | 0.10  | 0.13  | 0.13  | 0.15  | 0.10  | 0.10  | 0.084  | 0.11   | 0.14   | 0.11   |
| k2                          | 0.036 | 0.018    | 0.022  | 0.021 | 0.032 | 0.017 | 0.089 | 0.021 | 0.013 | 0.019  | 0.033  | 0.104  | 0.018  |
| k3                          | 0.55  | 0.035    | 0.064  | 0.011 | 0.15  | 0.011 | 0.28  | 0.51  | 0.014 | 0.12   | 0.068  | 0.29   | 0.035  |
| k4                          | 0.67  | 0.042    | 0.085  | 0.011 | 0.12  | 0.10  | 0.065 | 1.37  | 0.24  | 0.059  | 0.030  | 0.040  | 0.039  |
| VT                          | 6.12  | 12.35    | 9.13   | 9.33  | 8.77  | 8.78  | 8.93  | 6.39  | 8.22  | 13.61  | 10.17  | 10.98  | 12.03  |
| pretreatment with LY2886721 |       |          |        |       |       |       |       |       |       |        |        |        |        |
| K1                          | 0.15  | 0.10     | 0.11   | 0.10  | 0.12  | 0.14  | 0.15  | 0.12  | 0.11  | 0.092  | 0.12   | 0.11   | 0.11   |
| k2                          | 0.050 | 0.030    | 0.030  | 0.034 | 0.045 | 0.036 | 0.041 | 0.039 | 0.031 | 0.024  | 0.035  | 0.031  | 0.028  |
| k3                          | 0.046 | 0.016    | 0.0019 | 0.130 | 0.412 | 0.038 | 0.251 | 0.039 | 0.019 | 0.0087 | 0.0056 | 0.0018 | 0.0092 |
| k4                          | 0.19  | 0.95     | 0.19   | 0.80  | 1.19  | 0.84  | 3.40  | 0.71  | 0.97  | 0.57   | 0.20   | 0.24   | 0.82   |
| VT                          | 3.13  | 3.54     | 3.58   | 3.36  | 3.67  | 4.00  | 3.82  | 3.18  | 3.47  | 3.85   | 3.52   | 3.60   | 4.06   |

CB: cerebellum, ACC: anterior cingulate cortex, FC: frontal cortex, TC: temporal cortex, CAU: caudate, PUT: putamen, THA: thalamus, OC: occipital cortex, PC: parietal cortex, AMY: amygdala, HIP: hippocampus, INS: insula, VS: ventral striatum.

Supplemental Table 3.  $V_T$  values estimated by Logan graphical analysis

|            | CB   | ACC   | FC    | TC    | CAU   | PUT   | THA   | OC   | PC   | AMY   | HIP   | INS   | VS    |
|------------|------|-------|-------|-------|-------|-------|-------|------|------|-------|-------|-------|-------|
| NHP1_base  | 7.31 | 14.89 | 10.14 | 11.75 | 10.38 | 11.73 | 12.24 | 8.89 | 9.82 | 18.30 | 15.29 | 14.61 | 16.08 |
| NHP1_block | 2.64 | 3.23  | 3.04  | 3.13  | 3.58  | 4.31  | 3.55  | 3.12 | 3.12 | 3.81  | 3.54  | 3.14  | 3.91  |
| NHP2_base  | 5.81 | 11.56 | 8.69  | 8.90  | 8.34  | 8.38  | 8.50  | 6.10 | 7.84 | 12.74 | 9.49  | 10.38 | 11.25 |
| NHP2_block | 3.03 | 3.34  | 3.43  | 3.19  | 3.47  | 3.76  | 3.61  | 3.13 | 3.31 | 3.62  | 3.37  | 3.40  | 3.77  |

Supplemental Table 4. The average numbers of disintegrations in the source organs of two NHPs in the whole-body dosimetry experiment

|                          |          |
|--------------------------|----------|
| Brain                    | 2.20E-02 |
| Gallbladder Contents     | 1.55E-02 |
| LLI                      | 1.60E-02 |
| Small Intestine          | 1.59E-01 |
| Stomach                  | 5.77E-01 |
| ULI                      | 8.72E-02 |
| Heart Wall               | 2.00E-02 |
| Kidneys                  | 2.00E-02 |
| Liver                    | 2.47E-01 |
| Lungs                    | 6.10E-02 |
| Pancreas                 | 5.95E-04 |
| Spleen                   | 3.00E-03 |
| Urinary Bladder Contents | 1.52E-01 |
| Remainder                | 1.22E+00 |

Supplemental Table 5. Average human radiation doses estimates (adult male model) of two NHPs

| Target Organ                     | Estimated dose  |                 |
|----------------------------------|-----------------|-----------------|
|                                  | mSv/MBq         | rem/mCi         |
| Adrenals                         | 1.48E-02        | 5.46E-02        |
| Brain                            | 5.08E-03        | 1.88E-02        |
| Breasts                          | 6.99E-03        | 2.59E-02        |
| Gallbladder Wall                 | 4.35E-02        | 1.61E-01        |
| LLI Wall                         | 2.26E-02        | 8.37E-02        |
| Small Intestine                  | 4.57E-02        | 1.69E-01        |
| Stomach Wall                     | 2.22E-01        | 8.23E-01        |
| ULI Wall                         | 5.13E-02        | 1.90E-01        |
| Heart Wall                       | 2.05E-02        | 7.57E-02        |
| Kidneys                          | 2.25E-02        | 8.32E-02        |
| Liver                            | 3.66E-02        | 1.35E-01        |
| Lungs                            | 1.66E-02        | 6.11E-02        |
| Muscle                           | 9.31E-03        | 3.45E-02        |
| Ovaries                          | 1.60E-02        | 5.90E-02        |
| Pancreas                         | 2.61E-02        | 9.65E-02        |
| Red Marrow                       | 9.30E-03        | 3.45E-02        |
| Osteogenic Cells                 | 1.13E-02        | 4.18E-02        |
| Skin                             | 6.14E-03        | 2.27E-02        |
| Spleen                           | 1.89E-02        | 6.99E-02        |
| Testes                           | 7.71E-03        | 2.85E-02        |
| Thymus                           | 8.01E-03        | 2.96E-02        |
| Thyroid                          | 6.54E-03        | 2.42E-02        |
| Urinary Bladder Wall             | 8.00E-02        | 2.97E-01        |
| Uterus                           | 1.68E-02        | 6.22E-02        |
| Total Body                       | 1.11E-02        | 4.10E-02        |
| <b>Effective dose equivalent</b> | <b>3.54E-02</b> | <b>1.31E-01</b> |
| <b>Effective dose</b>            | <b>4.34E-02</b> | <b>1.61E-01</b> |
